# Supplementary material for: Risk Factors of Bacteremia following Multiple Traumas
Source: Hindawi journal article supplement (doi:10.1155/2020/9217949), 2020-04-06
Supplement: f1 [file 9217949.f1.pdf]

Supplementary Table 1: Risk factors for bacteremia (n = 34)

|                            | No. of patients (n) | No. of bacteremia patients (n, %) | Adjusted OR (95% CI)    | p-value       |
|----------------------------|---------------------|-----------------------------------|-------------------------|---------------|
| <b>ISS</b>                 |                     |                                   |                         | <b>*0.003</b> |
| ≤ 16                       | 416                 | 7 (1.9%)                          |                         |               |
| 17 >                       | 443                 | 27 (6.1%)                         |                         |               |
| <b>Head AIS</b>            |                     |                                   |                         | <b>0.705</b>  |
| 0                          | 572                 | 22 (3.8%)                         |                         |               |
| 1-3                        | 210                 | 11 (5.2%)                         |                         |               |
| 4-6                        | 77                  | 1 (1.3%)                          |                         |               |
| <b>Face AIS</b>            |                     |                                   |                         | <b>0.125</b>  |
| 0                          | 630                 | 23 (3.7%)                         |                         |               |
| 1-3                        | 213                 | 8 (3.8%)                          |                         |               |
| 4-6                        | 16                  | 3 (19.7%)                         |                         |               |
| <b>Chest AIS</b>           |                     |                                   |                         | <b>0.378</b>  |
| 0                          | 392                 | 15 (3.8%)                         |                         |               |
| 1-3                        | 406                 | 14 (3.4%)                         |                         |               |
| 4-6                        | 61                  | 5 (8.2%)                          |                         |               |
| <b>Abdominal AIS</b>       |                     |                                   |                         | <b>*0.001</b> |
| 0                          | 444                 | 8 (1.8%)                          |                         |               |
| 1-3                        | 322                 | 17 (5.3%)                         |                         |               |
| 4-6                        | 93                  | 9 (9.7%)                          |                         |               |
| <b>Extremity AIS</b>       |                     |                                   |                         | <b>*0.028</b> |
| 0                          | 403                 | 11 (2.7%)                         |                         |               |
| 1-3                        | 382                 | 17 (4.5%)                         |                         |               |
| 4-6                        | 74                  | 6 (8.1%)                          |                         |               |
| <b>External AIS</b>        |                     |                                   |                         | <b>0.086</b>  |
| 0                          | 718                 | 24 (3.3%)                         |                         |               |
| 1-3                        | 131                 | 10 (7.6%)                         |                         |               |
| 4-6                        | 10                  | 0                                 |                         |               |
| <b>Rib fracture</b>        | 335                 | 17 (5.1%)                         |                         | <b>0.245</b>  |
| <b>Hemothorax</b>          | 111                 | 8 (7.2%)                          |                         | <b>0.105</b>  |
| <b>Liver injury</b>        | 92                  | 8 (8.7%)                          | 2.709<br>(1.027-6.415)  | <b>*0.022</b> |
| <b>Pancreas injury</b>     | 19                  | 3 (15.8%)                         | 4.874<br>(0.869-18.362) | <b>*0.036</b> |
| <b>Bowel perforation</b>   | 57                  | 9 (15.8%)                         | 5.804<br>(2.256-13.759) | <b>*0.001</b> |
| <b>Pelvic injury</b>       | 217                 | 14 (6.5%)                         | 2.143<br>(0.982-4.554)  | <b>*0.047</b> |
| <b>Degloving injury</b>    | 22                  | 1 (4.5%)                          |                         | <b>0.593</b>  |
| <b>Urogenital injury</b>   | 27                  | 2 (7.4%)                          |                         | <b>0.290</b>  |
| <b>Shock</b>               | 161                 | 13 (8.1%)                         | 2.827<br>(1.349-5.764)  | <b>*0.006</b> |
| <b>Massive Transfusion</b> | 70                  | 10 (14.3%)                        | 5.337<br>(2.323-11.452) | <b>*0.001</b> |

406ISS, Injury severity score; AIS, abbreviated injury scale.

407\* Significance set as  $p = 0.05$
